# Supplementary material
Source: MDPI journal article supplement (https://www.mdpi.com/1999-4907/11/10/1068)
Supplement: s1 [file s1]

# To Plant or Not to Plant, That Is the Question: Reforestation vs. Natural Regeneration of Hurricane-Disturbed Mangrove Forests in Guanaja (Honduras)

Thomas Fickert

Faculty of Arts and Humanities, University of Passau, Innstraße 40, D-94032 Passau, Germany

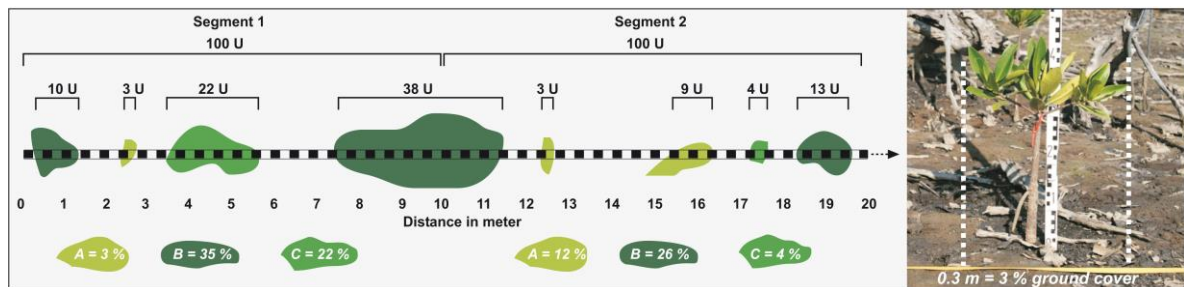

Figure S1.

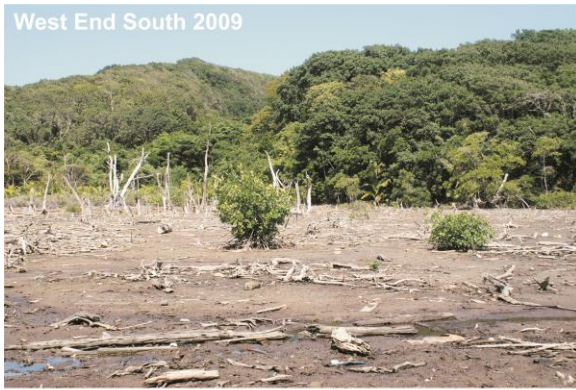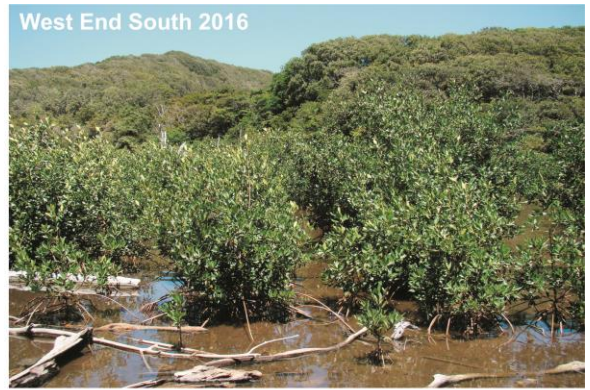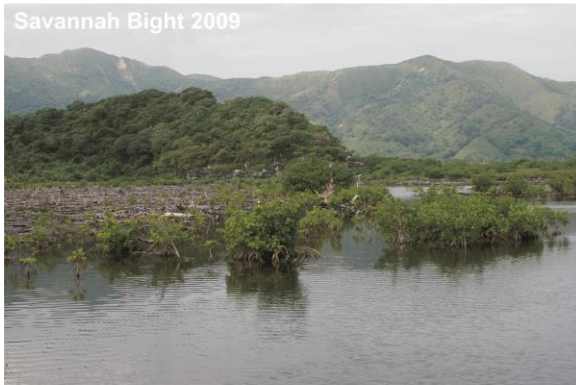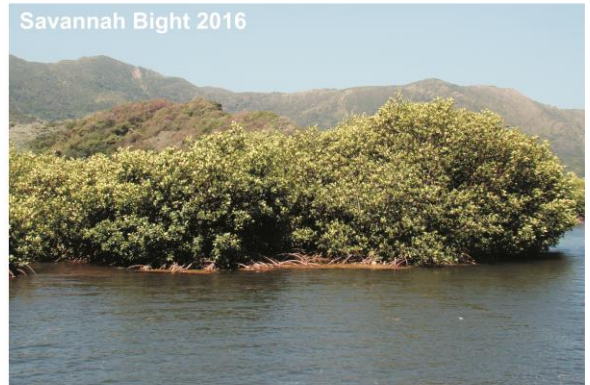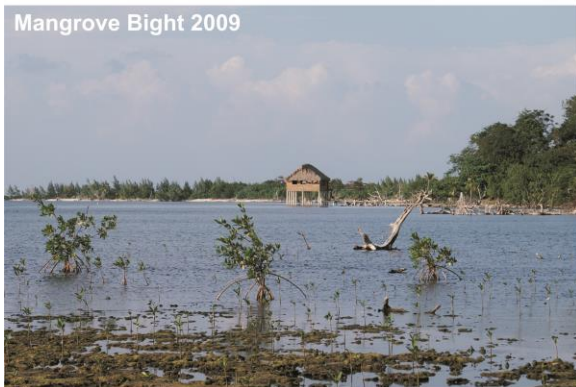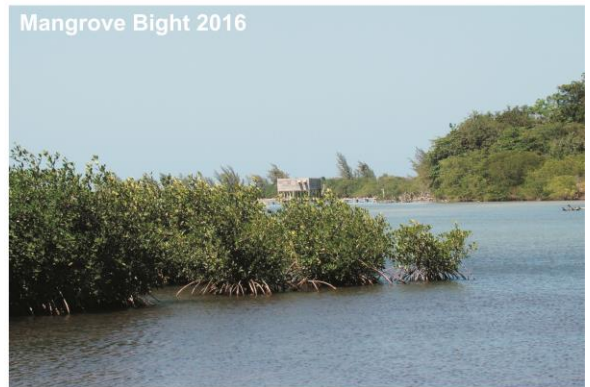

Figure S2.

Table S1.

| Species                          | Family         | Life-form | Mangrove Bight |       |       | Savannah Bight |      |       | West End South |      |       |
|----------------------------------|----------------|-----------|----------------|-------|-------|----------------|------|-------|----------------|------|-------|
|                                  |                |           | 2005           | 2009  | 2016  | 2005           | 2009 | 2016  | 2005           | 2009 | 2016  |
| <i>Acrostichum aureum</i>        | Adiantaceae    | fern      | 22.26          | 22.07 | 19.65 |                |      |       | 9.30           | 9.57 | 8.42  |
| <i>Sesuvium portulacastrum</i>   | Aizoaceae      | herb      |                | 0.25  | 1.40  |                | 0.11 | 0.13  |                |      |       |
| <i>Blutaparon vermiculare</i>    | Amaranthaceae  | herb      |                | 2.63  | 16.41 |                | 0.13 |       |                |      |       |
| <i>Rhabdadenia biflora</i>       | Apocynaceae    | climber   |                |       |       |                |      |       | 1.46           | 1.86 |       |
| <i>Cocos nucifera</i>            | Arecaceae      | palm      |                |       |       |                |      |       | 0.77           | 0.87 | 0.87  |
| <i>Eclipta prostrata</i>         | Asteraceae     | herb      |                | 0.04  |       |                |      |       |                |      |       |
| <i>Cakile lanceolata</i>         | Brassicaceae   | herb      |                | 0.40  |       |                |      |       |                |      |       |
| <i>Tillandsia dasyrillifolia</i> | Bromeliaceae   | epiphyte  | 0.10           |       |       |                |      |       | 0.14           | 0.09 |       |
| <i>Conocarpus erecta</i>         | Combretaceae   | tree      | 0.92           | 0.87  | 1.40  |                |      |       |                |      |       |
| <i>Laguncularia racemosa</i>     | Combretaceae   | tree      | 0.68           | 1.62  | 15.47 | 0.67           | 5.15 | 8.33  | 2.64           | 4.02 | 9.00  |
| <i>Cyperus esculentus</i>        | Cyperaceae     | herb      |                |       | 0.06  |                |      |       |                |      |       |
| <i>Myrmecophila tibicinis</i>    | Orchidaceae    | epiphyte  | 0.02           |       |       |                |      |       | 0.05           |      |       |
| <i>Distichlis spicata</i>        | Poaceae        | graminoid |                | 0.54  | 0.24  |                | 4.35 |       |                |      | 0.50  |
| <i>Spartina spartinae</i>        | Poaceae        | graminoid |                | 0.29  |       |                |      |       |                |      |       |
| <i>Rhizophora mangle</i>         | Rhizophoraceae | tree      | 0.26           | 1.74  | 20.18 | 1.78           | 6.38 | 43.13 | 6.43           | 9.76 | 39.00 |
| <i>Typha domingensis</i>         | Typhaceae      | herb      |                | 4.76  | 4.76  |                |      |       |                |      |       |
| <i>Avicennia germinans</i>       | Verbenaceae    | tree      |                |       | 6.87  |                | 1.22 | 3.84  |                |      | 0.92  |
| woody debris                     |                |           | 16.06          | 2.42  | 1.20  | 8.41           | 1.73 |       | 22.37          | 2.59 | 0.27  |
